# Supplementary material for: Identification of errors in the IEDB using ontologies
Source: Database (Oxford). 2018 Feb 22;2018:bay005. doi: 10.1093/database/bay005 (PMC5824775; doi:10.1093/database/bay005)
Supplement: Supplementary Table [file bay005_supp_table_1.xlsx]

## Sheet: Sheet1
Cell Type in IEDB	Uses	Ontology Used	Ontology term	New Request
PBMC	63335	CL	peripheral blood mononuclear cell
Splenocytes	15730	CL	splenocyte
null	9421	NA
CD8+ T cells	8898	CL	CD8-positive, alpha-beta T cell
T cells	6731	CL	T cell
CD4+ T cells	5658	CL	CD4-positive, alpha-beta T cell
Lymph node cells	5614	OBI	lymph node cell specimen
CTL	3753	CL	T cell
LPS (Lipopolysaccharide) Blast cells	3280	CL	B cell
Jurkat	3125	CLO	JURKAT cell
B Lymphoblastoid Cell Line (B-LCL)	3076	CL	B cell
Lymphocyte	2987	CL	lymphocyte
Dendritic Cells	2918	CL	dendritic cell
PBMC (CD8-)	1240	NA
P815	1023	CLO	P815 cell
EL-4 cells	801	CLO	EL4 cell
T2 cells	604	CLO	T2 (174 x CEM.T2) cell
Unknown	596	NA
T cell hybridoma	406	CL	hybridoma T cell line cell	x
Mononuclear cells	343	CL	mononuclear cell
Macrophage	341	CL	macrophage
B cells	336	CL	B cell
JY cells	313	CLO	JY cell	x
PHA-blasts	256	NA
L cells	238	CLO	L-M cell
Fibroblast	228	CL	fibroblast
C1R cells	200	CLO	HMy2.CIR cell
RMA-S cells	182	CLO	RMA cell line
adherent cells	181	none	none
Monocyte	148	CL	mononuclear cell
MC57 cells	146	CLO	MC57G cell
Other	124	NA
721.221	118	CL	B cell
L929	88	CL	fibroblast
A20	77	CL	B cell
RMA	73	CLO	RMA cell line	x
C1R-A24	58	CLO	HMy2.CIR cell
Con-A blasts	50	CL	lymphocyte
BALB/cl 7 fibroblast cell line	47	CL	fibroblast
&gamma;&delta; T cells	38	CL	gamma-delta T cell
Plasma cells	38	CL	plasma cell
J774	33	CL	macrophage
EX-38	28	NA
Tumor	28	NA
2R cells	26	NA
THP-1	24	CLO	THP-1 cell
P388	19	NA
CD3+ cells	17	CL	T cell
BVR	15	NA
Transgeneic CD4+ cells	14	CL	CD4-positive, alpha-beta T cell
HepG2	12	CL	hepatocyte
K-562	11	NA
RDM4	11	NA
PBMC (CD4-/CD8-)	10	NA
Thymocytes	10	CL	thymocyte
Epithelial	8	CL	epithelial cell
Pc11198	8	NA
293-T	7	CLO	RCB2202 cell
BMC (Brain Mononuclear Cells)	7	CL	mononuclear cell
EK cells	7	NA
Hepatocyte	7	CL	hepatocyte
Melanoma cells	7	NA
SFMC	7	NA
Transgeneic CD8+ cells	7	CL	CD8-positive, alpha-beta T cell
NK-T cells	6	CL	mature NK T cell
T/B Hybrid cell line	6	NA
BLS (Bare Lymphocyte Syndrome)	5	NA
Kidney Cells	5	NA
LNCaP	5	NA
UACC-812	5	NA
Alveolar epithelial cells	4	CL	epithelial cell
AnTMSA2	4	NA
B78-D14 Melanoma	4	NA
Granuloma	4	NA
HEK-293T	4	CLO	RCB2202 cell
HeLa cells	4	CLO	HeLa cell
JAWS II	4	CLO	JAWSII cell
9C10	3	NA
MCF-7	3	CLO	MCF 7 cell
NA neuroblastoma cells	3	NA
NK-CTL cells	3	CL	mature NK T cell
PBMC (CD4-)	3	NA
3DT-52.5	2	NA
8C7	2	NA
Burkitt Lymphoma Cells	2	NA
GL261	2	NA
KR158D	2	NA
L12.3	2	NA
LB15	2	NA
MC38	2	NA
MCA 205	2	NA
MDA Pca 2b	2	NA
MDA-231	2	CLO	MDA-MB-231 cell
SF9-ICAM/B7	2	NA
SW480	2	NA
AHH-1	1	NA
B8 cells	1	NA
Fuji	1	NA
Me275	1	NA
MZ2-MEL.3.1/B57/c4	1	NA
SK-HEP-1	1	NA
SK-MEL-37	1	NA
VRNS-F1	1	NA
Other or null		CL	basophil
Other or null		CL	endothelial cell
Other or null		CL	erythrocyte
Other or null		CL	mast cell
Other or null		CL	oocyte
Other or null		CL	platelet
Other or null		CL	spermatocyte
Other or null		CL	stem cell
Other or null		CL	type B pancreatic cell
Other or null		CLO	HCC1143 cell
Other or null		CLO	HCT 116 cell
Other or null		CLO	PC-3 cell
Other or null		CLO	SUP-B15 cell
Other or null		CLO	SUP-T1 cell
Other or null		CLO	U266B1 cell
Other or null		CLO	U-937 cell
Other or null		CLO	MM.1S cell	x
Other or null		CLO	LSCC-RP9 cell	x
Other or null		CLO	UCI 107 cell	x
Other or null		CLO	UCI 101 cell	x
Other or null		CLO	CA46 cell
Supplemental Table 1. List of cell types previously utilized in the IEDB, how frequently each was used, and how they were mapped to ontology terms. If the ontology term had to be requested as a new term or not is noted in the New Request column. Some terms were mapped from either "Other" or "null" to a more specific term. Terms marked as "NA" were either recurated to use more specific or more vag…
NA= not applicable.
